# Supplementary material for: A new closed-vessel conductively heated digestion system: fostering plant analysis by inductively coupled plasma optical emission spectroscopy
Source: Royal Society of Chemistry journal article supplement (doi:10.1039/c3ja50369k), 2014-01-01
Supplement: c3ja50369k.pdf [file c3ja50369k.pdf]

## Video Captions

Video 1. Digestion of 200 mg spinach leaves using 1.5 mL concentrated (69%)  $\text{HNO}_3$  with and without the addition of 1.5 mL (30%)  $\text{H}_2\text{O}_2$ .

Video 2. Digestion of 200, 300 and 400 mg spinach leaves using 2.0 mL of concentrated (69%)  $\text{HNO}_3$  and 2.0 mL of (30%)  $\text{H}_2\text{O}_2$ .
